## CORRECTION

# Correction: The effect of exposure to farmed salmon on piscine orthoreovirus infection and fitness in wild Pacific salmon in British Columbia, Canada

Alexandra Morton, Richard Routledge, Stacey Hrushowy, Molly Kibenge, Frederick Kibenge

Following publication of [1], an amended version of S3 Table in [1] was published in a Correction [2].

There are errors in [S1 File](#) in [2]. Specifically,

1. A PRV Ct value is missing in cell H29
2. A pivot table was erroneously included that is not part of the underlying data for the published study [1]

Here, the authors provide a corrected version of S3 Table of [1] ([S1 File](#)) that includes the amendments described in [2] and addresses the issues above by providing the missing PRV Ct value and removing the pivot table. As such, the [S1 File](#) of [2] is superseded by the [S1 File](#) provided in this notice.

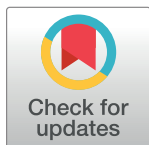

## Supporting information

**S1 File. Amended version of the Wild salmonid data file (S3 Table in [1]).**  
(XLSX)

## References

1. Morton A, Routledge R, Hrushowy S, Kibenge M, Kibenge F (2017) The effect of exposure to farmed salmon on piscine orthoreovirus infection and fitness in wild Pacific salmon in British Columbia, Canada. PLoS ONE 12(12): e0188793. <https://doi.org/10.1371/journal.pone.0188793> PMID: 29236731
2. Morton A, Routledge R, Hrushowy S, Kibenge M, Kibenge F (2021) Correction: The effect of exposure to farmed salmon on piscine orthoreovirus infection and fitness in wild Pacific salmon in British Columbia, Canada. PLoS ONE 16(3): e0248912. <https://doi.org/10.1371/journal.pone.0248912> PMID: 33725019

## OPEN ACCESS

**Citation:** Morton A, Routledge R, Hrushowy S, Kibenge M, Kibenge F (2023) Correction: The effect of exposure to farmed salmon on piscine orthoreovirus infection and fitness in wild Pacific salmon in British Columbia, Canada. PLoS ONE 18(3): e0282687. <https://doi.org/10.1371/journal.pone.0282687>

**Published:** March 2, 2023

**Copyright:** © 2023 Morton et al. This is an open access article distributed under the terms of the [Creative Commons Attribution License](#), which permits unrestricted use, distribution, and reproduction in any medium, provided the original author and source are credited.
